# Supplementary material
Source: PubMed Central journal article supplement (PMC5536176)
Supplement: NIHMS885822-supplement-Supple_ALL.pdf [file NIHMS885822-supplement-Supple_ALL.pdf]

## SUPPLEMENTARY INFORMATION

### Development of the prediction model

Before we applied the prognostic classification algorithms, gene expression data for the training and test sets were normalized by centralizing the gene expression level across the tissues. Gene symbols were used to match orthologous genes between humans and mice. To stratify HCC patients according to the mouse SOH gene expression signature, we used a classification algorithm based on Bayesian compound covariate predictor (BCCP), as described below.

To generate the probability of silence of the Hippo pathway in each patient with HCC, we used expression data in the mouse SOH signature (training set, **Fig. 1B**) to build a classifier based on the BCCP algorithm.<sup>1</sup> The paragraphs below describe the classifier development algorithms that were applied in the training and test sets.

Let  $t_j$  denote the t statistic for gene  $j$  for comparing class 1 (SOH) to class 2 (AH) in the training set.

$$t_j = \frac{\bar{x}_j^{(1)} - \bar{x}_j^{(2)}}{s_j \sqrt{1/n_1 + 1/n_2}} \quad (1)$$

where  $\bar{x}_j^{(m)}$  denotes the mean of log expression  $j$  for training samples in class  $m$  ( $m=1,2$ ),  $s_j$  is an estimate of intra-class variance for gene  $j$ , and  $n_m$  is the number of cases in the training set in class  $m$  ( $m=1,2$ ).

Let  $x_{ij}$  denote the log expression for gene  $j$  in sample  $i$  of the training set. For each sample of the training set, the compound covariate value is computed as follows:

$$C_i = \sum_{j \in \text{Selected}} t_j x_{ij} \quad (2)$$

Let  $\bar{C}^{(1)}$  denote the mean of the  $C_i$  values for samples in class 1 in the training set and let  $\bar{C}^{(2)}$  denote the mean for samples in class 2 of the training set.

The compound covariate for sample  $y$  in the test set is defined by the following:

$$C = \sum_{j \in \text{Selected}} t_j y_j \quad (3)$$

To classify a case not in the training set with log expression values  $Y = (y_1, y_2, \dots, y_p)$ , the compound covariate value  $C$  is computed using expression (3). The probability that sample  $Y$  came from class 1 is estimated as

$$\Pr[Y \text{ in class 1}] = \frac{\phi(C; \bar{C}^{(1)}, V) \pi_1}{\phi(C; \bar{C}^{(1)}, V) \pi_1 + \phi(C; \bar{C}^{(2)}, V) (1 - \pi_1)} \quad (4),$$

where  $\phi(C; \bar{C}^{(1)}, V)$  denotes the Gaussian density of a value  $C$  when the mean is  $\bar{C}^{(1)}$  and the variance is  $V$ .  $\pi_1$  denotes equal prior probability that the class is 1 (0.5).

In equation (4),

$$\bar{C}^{(1)} = \sum_{j \text{ in class 1}} C_j, \bar{C}^{(2)} = \sum_{j \text{ in class 2}} C_j$$

$$\text{Gaussian Density } \phi(C; \bar{C}^{(1)}, V) = \frac{1}{\sqrt{2\pi V}} \exp\left(-\frac{(C - \bar{C}^{(1)})^2}{2V}\right)$$

$$V = \frac{\sum_{j \text{ in class 1}} (C_j - \bar{C}^{(1)})^2 + \sum_{j \text{ in class 2}} (C_j - \bar{C}^{(2)})^2}{n_1 + n_2 - 2}$$

The probability that the new sample  $Y$  is from class 2 is 1 minus the value given in (4). The class with the greater computed probability is predicted for the new sample. The Bayesian compound covariate method was developed by Wright et al.<sup>2</sup>

The trained BCCP was applied to gene expression data from the NCI cohort (test set 1) and a probability of SOH was generated for each patient. SOH probabilities ranged from 0.888 to 0.127 among all HCC patients in the NCI cohort and were significantly associated with overall survival (hazard ratio [HR], 10.6; 95% confidence interval [CI], 3.0 – 37.2;  $P = 2.3 \times 10^{-4}$ ) and recurrence-free survival (HR, 9.8; 95% CI, 1.6 – 61.5;  $P = 0.01$ ) as a continuous prediction value.

We next carried out receiver operating characteristic (ROC) plotting to identify an optimal threshold of SOH probability that would best discriminate high-risk patients from low-risk patients for 3-year recurrence using data from the NCI cohort. According to the Youden indices,<sup>3</sup> the optimal threshold value was 0.65. An ROC analysis was performed using the pROC package in R.<sup>4</sup>

#### Reference List

1. Radmacher MD, McShane LM, Simon R. A paradigm for class prediction using gene expression profiles. *J Comput Biol* 2002;9:505-511.
2. Wright G, Tan B, Rosenwald A et al. A gene expression-based method to diagnose clinically distinct subgroups of diffuse large B cell lymphoma. *Proc Natl Acad Sci U S A* 2003;100:9991-9996.
3. YOUDEN WJ. Index for rating diagnostic tests. *Cancer* 1950;3:32-35.
4. Robin X, Turck N, Hainard A et al. pROC: an open-source package for R and S+ to analyze and compare ROC curves. *BMC Bioinformatics* 2011;12:77. doi: 10.1186/1471-2105-12-77.:77-12.

**A**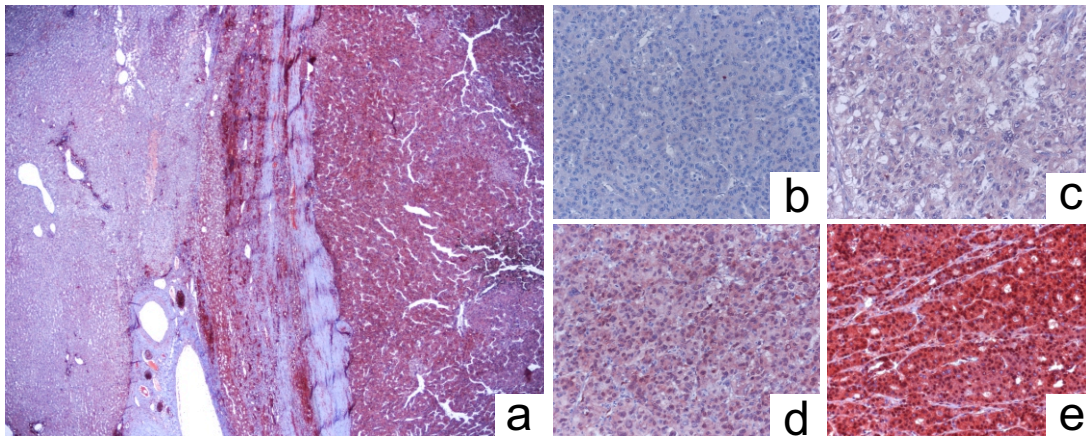**B**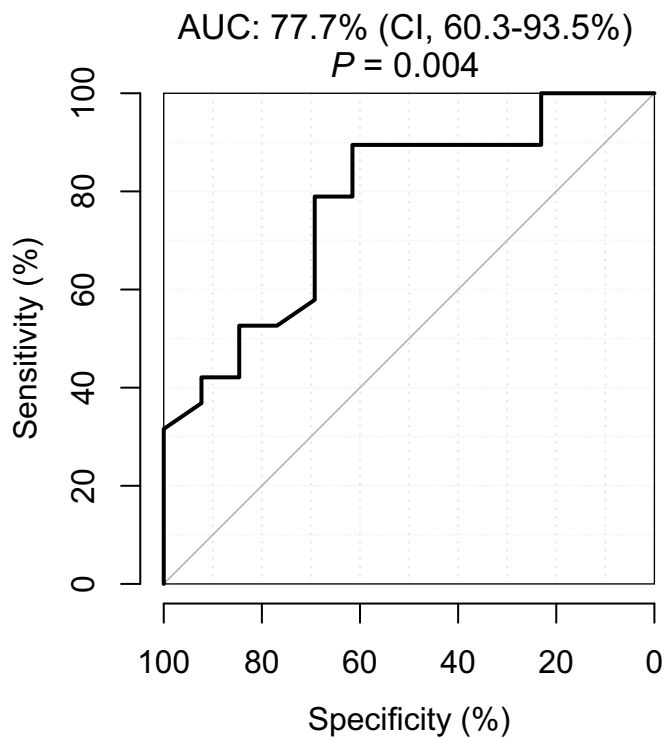

**Supplementary Figure 1.** Significant concordance between silence of Hippo signature and YAP1 expression in human hepatocellular carcinoma (HCC).

(A) Immunohistochemical staining of YAP1 in human HCC tissues from the Korean patient cohort. a, On low-power view, the expression of YAP1 was higher in tumors (right) than in adjacent non-tumoral hepatocytes (left). b-e, Variable expression of YAP1 in HCC: b) negative, c) weak expression, d) intermediate expression, and e) strong expression. Original magnification: a, x20, b-e, x200.

(B) The significance of concordance between YAP1 expression and SOH probability in human HCC from the Korean cohort was estimated using the area under the curve (AUC) from the receiver operating characteristics analysis after immunohistochemically staining HCC tissues with anti-YAP1 antibody (1 for positive and 0 for negative staining). CI: confidence interval.

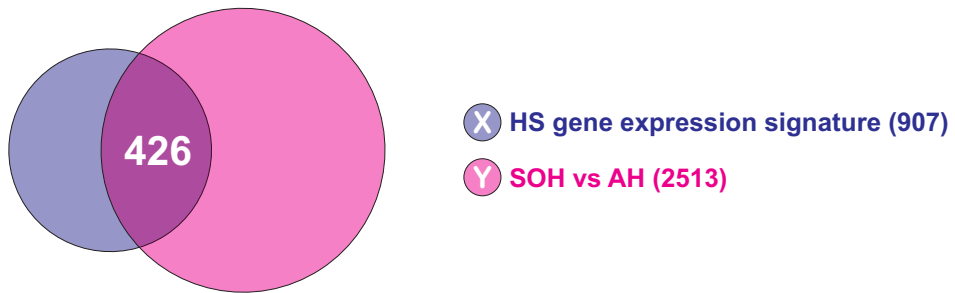

**Supporting Figure 2 Venn diagram of gene lists from two different gene expression signatures**

The blue circle (gene list X) represents genes from the previously identified HS signature from the NCI cohort. The magenta circle (gene list Y) represents genes differentially expressed between silence of Hippo (SOH) subtype and active Hippo (AH) subtype in the NCI cohort ( $P < 0.001$ , 2513 gene features). Of 907 genes in the HS signature, 426 genes (47%) were present in the gene list specific to SOH subtype in the NCI cohort.

**Supplementary Table 1. Genes in the SOH signature.**

| <b>Probe ID</b> | <b>Symbol</b> | <b>ENTREZ_ID</b> | <b>T value</b> |
|-----------------|---------------|------------------|----------------|
| ILMN_1212836    | Ptprc         | 19264            | 2.765          |
| ILMN_1213708    | 4732462B05Rik |                  | -0.988         |
| ILMN_1213958    | Sec23a        | 20334            | -2.799         |
| ILMN_1214118    | Plekha2       | 83436            | 3.511          |
| ILMN_1214498    | Cyp2d22       | 56448            | -5.185         |
| ILMN_1214838    | Hsd3b2        | 15493            | -4.724         |
| ILMN_1214918    | LOC546015     | 546015           | 4.227          |
| ILMN_1215124    | Klhl13        | 67455            | 4.777          |
| ILMN_1215212    | Rhob          | 11852            | 4.395          |
| ILMN_1215305    | Kat2b         | 18519            | -3.056         |
| ILMN_1215791    | Alox5ap       |                  | 0.922          |
| ILMN_1215807    | Glpr1         | 73690            | 4.099          |
| ILMN_1216409    | 1500012F01Rik | 68949            | 4.135          |
| ILMN_1216764    | Ier3          | 15937            | 5.91           |
| ILMN_1216880    | Emr1          | 13733            | 0.807          |
| ILMN_1217180    | Ifitm1        | 68713            | -0.088         |
| ILMN_1217280    | 4930528F23Rik | 75178            | -3.528         |
| ILMN_1217389    | Pkib          | 18768            | 1.358          |
| ILMN_1217849    | Laptm5        | 16792            | 2.564          |
| ILMN_1218592    | Tes           | 21753            | 5.254          |
| ILMN_1218681    | Cp            |                  | 3.166          |
| ILMN_1218799    | Emb           | 13723            | 2.119          |
| ILMN_1219016    | Wwtr1         | 97064            | 5.265          |
| ILMN_1219298    | Art4          | 109978           | -1.141         |
| ILMN_1219583    | Capn2         | 12334            | -1.062         |
| ILMN_1219820    | 1200002N14Rik | 71712            | 2.558          |
| ILMN_1219904    | Tspan33       | 232670           | -3.093         |
| ILMN_1220121    | Kif23         |                  | 4.716          |
| ILMN_1220261    | Tspan8        | 216350           | 3.752          |
| ILMN_1220939    | Epb4.114a     |                  | 3.152          |
| ILMN_1220974    | B3galnt2      | 97884            | -3.186         |
| ILMN_1221102    | Arl5a         | 75423            | -2.991         |
| ILMN_1221157    | Krt8          | 16691            | 5.37           |
| ILMN_1221290    | LOC636952     | 636952           | 4.148          |
| ILMN_1221817    | Cd74          | 16149            | 4.227          |
| ILMN_1222246    | Adfp          | 11520            | -3.438         |
| ILMN_1222269    | 1810011H11Rik | 69069            | 1.708          |
| ILMN_1222500    | LOC100047162  | 1E+08            | 0.952          |
| ILMN_1222860    | Gm5150        | 381484           | -0.964         |
| ILMN_1223041    | Abi3          |                  | 1.164          |

|              |              |        |        |
|--------------|--------------|--------|--------|
| ILMN_1223257 | Ccl4         | 20303  | 4.102  |
| ILMN_1223285 | Hspa2        | 15512  | 3.52   |
| ILMN_1223317 | Lgals3       | 16854  | 3.699  |
| ILMN_1223552 | Fbn1         |        | 3.048  |
| ILMN_1223949 | Cldn4        | 12740  | 1.588  |
| ILMN_1223999 | LOC381222    |        | -5.605 |
| ILMN_1224635 | Fkbp11       | 66120  | 5.185  |
| ILMN_1224719 | LOC665032    | 665032 | 3.416  |
| ILMN_1224754 | Ckb          | 12709  | 0.841  |
| ILMN_1224768 | Ehd4         | 98878  | 5.427  |
| ILMN_1224855 | Samd9l       | 209086 | 2.918  |
| ILMN_1225535 | Ganab        | 14376  | -3.987 |
| ILMN_1225985 | Serpina7     | 331535 | 1.62   |
| ILMN_1226455 | Ftcd         | 14317  | -5.603 |
| ILMN_1226525 | H2-Ab1       | 14961  | 3.986  |
| ILMN_1226829 | Cd93         | 17064  | 4.42   |
| ILMN_1226978 | Pex5         |        | -3.956 |
| ILMN_1227111 | LOC240549    |        | -3.749 |
| ILMN_1227573 | Irf7         | 54123  | -0.296 |
| ILMN_1227831 | Trfr2        | 50765  | -4.738 |
| ILMN_1227875 | Fkbp7        | 14231  | 1.542  |
| ILMN_1227907 | Gmfg         | 63986  | 0.457  |
| ILMN_1228213 | Ifi30        | 65972  | 1.35   |
| ILMN_1228474 | Ctsj         | 26898  | -0.422 |
| ILMN_1228535 | Pmp22        | 18858  | -0.558 |
| ILMN_1228948 | Ugt1a1       | 394436 | -5.064 |
| ILMN_1229082 | Klhl21       | 242785 | -2.891 |
| ILMN_1229577 | Sstr2        |        | 5.309  |
| ILMN_1229667 | Slc43a1      | 72401  | -4.58  |
| ILMN_1230032 | EG384596     | 384596 | 3.475  |
| ILMN_1230119 | Gcap27       |        | 4.688  |
| ILMN_1230318 | Cbs          |        | -5.191 |
| ILMN_1230788 | Tle1         | 21885  | -2.716 |
| ILMN_1231012 | Lcp2         | 16822  | 1.233  |
| ILMN_1231513 | Tacstd2      | 56753  | 1.276  |
| ILMN_1231814 | Ccl5         | 20304  | 2.145  |
| ILMN_1231896 | Ssbp4        |        | 3.182  |
| ILMN_1232495 | LOC100044177 |        | 3.101  |
| ILMN_1232537 | Arl4c        | 320982 | 3      |
| ILMN_1232601 | Cyb561       | 13056  | 2.751  |
| ILMN_1232716 | Cyp1b1       | 13078  | 1.534  |
| ILMN_1232884 | Sphk1        | 20698  | 2.681  |
| ILMN_1232948 | Pnp          |        | -0.111 |

|              |                |        |        |
|--------------|----------------|--------|--------|
| ILMN_1232995 | 1810023F06Rik  | 217845 | 3.745  |
| ILMN_1233175 | LOC632667      | 632667 | 5.319  |
| ILMN_1233334 | Fpgs           | 14287  | -3.462 |
| ILMN_1233455 | Olfml3         | 99543  | 2.187  |
| ILMN_1234223 | Pld4           | 104759 | 0.479  |
| ILMN_1234773 | Anxa13         | 69787  | 0.261  |
| ILMN_1234824 | Ccdc80         | 67896  | 0.725  |
| ILMN_1235196 | Atp10d         | 231287 | 5.038  |
| ILMN_1235635 | Slco3a1        | 108116 | 4.54   |
| ILMN_1235932 | Pdgfra         | 18595  | -0.925 |
| ILMN_1236010 | scl0003799.1_2 |        | 5.315  |
| ILMN_1236354 | E130302P19Rik  |        | -4.235 |
| ILMN_1236757 | Oxct1          | 67041  | 3.826  |
| ILMN_1236758 | Wfdc2          | 67701  | 3.545  |
| ILMN_1237033 | LOC384710      | 384710 | 5.001  |
| ILMN_1237186 | Spint1         | 20732  | 4.373  |
| ILMN_1237886 | Enc1           | 13803  | 4.748  |
| ILMN_1238592 | Pigh           | 110417 | 4.94   |
| ILMN_1238597 | Omd            | 27047  | 1.721  |
| ILMN_1238603 | Pcolce2        | 76477  | -1.402 |
| ILMN_1238838 | LOC100045005   | 1E+08  | 4.258  |
| ILMN_1238874 | LOC100047759   | 1E+08  | 3.663  |
| ILMN_1239102 | H2-Eb1         | 14969  | 4.034  |
| ILMN_1239196 | 1700088E04Rik  | 27660  | 3.824  |
| ILMN_1239397 | LOC100047934   |        | 1.371  |
| ILMN_1239872 | LOC665792      | 665792 | -1.101 |
| ILMN_1240471 | Retsat         | 67442  | -3.305 |
| ILMN_1240624 | 1700011H14Rik  | 67082  | 3.137  |
| ILMN_1240864 | Tyki           |        | 2.133  |
| ILMN_1241171 | Anxa3          | 11745  | 3.635  |
| ILMN_1241695 | Ms4a6d         | 68774  | 3.185  |
| ILMN_1242999 | Avpr1a         | 54140  | -1.207 |
| ILMN_1243212 | Sparc          | 20692  | 3.567  |
| ILMN_1243433 | LOC100048037   |        | 4.186  |
| ILMN_1243507 | Spsb4          | 211949 | -0.702 |
| ILMN_1243616 | Cdkn3          | 72391  | 5.611  |
| ILMN_1243900 | LOC626152      | 626152 | 5.403  |
| ILMN_1244169 | Sftpd          | 20390  | 4.442  |
| ILMN_1244291 | Gja1           | 14609  | 2.088  |
| ILMN_1244536 | Hnrpa1         |        | 4.485  |
| ILMN_1244977 | H2-DMb1        | 14999  | 3.282  |
| ILMN_1245307 | Fbln2          | 14115  | 2.721  |
| ILMN_1245693 | A530020H22Rik  |        | -2.429 |

|              |               |        |        |
|--------------|---------------|--------|--------|
| ILMN_1245994 | Flna          | 192176 | 4.612  |
| ILMN_1246056 | Gngt2         | 14710  | -0.107 |
| ILMN_1246558 | Atad4         | 217138 | 4.552  |
| ILMN_1246573 | Calml4        |        | 5.758  |
| ILMN_1246609 | Rasgrp1       | 19419  | 0.423  |
| ILMN_1246821 | E130203B14Rik | 320736 | 1.689  |
| ILMN_1246861 | Ctss          | 13040  | 2.626  |
| ILMN_1247127 | B930075F07    |        | -2.928 |
| ILMN_1247348 | Ghr           |        | -2.309 |
| ILMN_1247377 | Mpeg1         | 17476  | 4.091  |
| ILMN_1247422 | Ces1b         | 382044 | -5.964 |
| ILMN_1247592 | Casp1         | 12362  | 5.709  |
| ILMN_1247704 | Hmgn3         | 94353  | 2.096  |
| ILMN_1248099 | Col16a1       | 107581 | 3.538  |
| ILMN_1248132 | Stmn1         |        | 5.361  |
| ILMN_1248415 | Tgoln1        | 22134  | -5.16  |
| ILMN_1248959 | Tinag         | 26944  | 4.384  |
| ILMN_1249021 | Bcl2          | 12043  | 4.036  |
| ILMN_1249220 | Col6a3        | 12835  | 1.868  |
| ILMN_1249246 | LOC384022     |        | -5.724 |
| ILMN_1249366 | LOC100046608  |        | 3.055  |
| ILMN_1249480 | 1300010F03Rik | 219189 | -3.987 |
| ILMN_1249486 | Mgl1          | 17312  | 1.605  |
| ILMN_1249498 | Plek          | 56193  | 3.115  |
| ILMN_1249578 | Sorl1         | 20660  | 4.016  |
| ILMN_1249666 | Ppap2c        | 50784  | 5.651  |
| ILMN_1249945 | 9930004G02Rik |        | -2.42  |
| ILMN_1250260 | Il10rb        | 16155  | 3.973  |
| ILMN_1250279 | Serpinb6a     | 20719  | 4.723  |
| ILMN_1250438 | Marcks1       | 17357  | 3.194  |
| ILMN_1251098 | LOC671641     | 671641 | 4.24   |
| ILMN_1251390 | Tbxas1        | 21391  | 0.83   |
| ILMN_1251669 | Evi2a         | 14017  | 1.961  |
| ILMN_1251748 | Cytip         | 227929 | 2.256  |
| ILMN_1251837 | Slco1b2       | 28253  | -3.841 |
| ILMN_1252076 | Lyz2          | 17105  | 1.833  |
| ILMN_1252202 | Tnfaip3       | 21929  | 4.338  |
| ILMN_1252831 | 2310014H01Rik | 76448  | 2.716  |
| ILMN_1253233 | Dsg1c         |        | 3.302  |
| ILMN_1253563 | Cyp2d13       | 68444  | -4.903 |
| ILMN_1253741 | Pcolce        | 18542  | 4.392  |
| ILMN_1253808 | Oas1g         | 23960  | 2.129  |
| ILMN_1253813 | Nckap1l       | 105855 | 1.842  |



|              |                    |        |        |
|--------------|--------------------|--------|--------|
| ILMN_1253838 | Pawr               | 114774 | 3.64   |
| ILMN_1254721 | EG13909            | 13909  | -5.868 |
| ILMN_1254878 | Eif4e3             | 66892  | 3.193  |
| ILMN_1255871 | Loxl1              | 16949  | 1.79   |
| ILMN_1256142 | Marcks             | 17118  | 3.56   |
| ILMN_1256257 | LOC100038882       | 1E+08  | 1.281  |
| ILMN_1256423 | Ranbp3l            | 223332 | 0.606  |
| ILMN_1256725 | Acads              | 11409  | -3.788 |
| ILMN_1256817 | Slpi               | 20568  | 5.041  |
| ILMN_1257209 | Wipf1              | 215280 | 1.724  |
| ILMN_1257574 | Esm1               | 71690  | 5.821  |
| ILMN_1257575 | Cst3               | 13010  | 3.387  |
| ILMN_1257771 | LOC638301          | 638301 | 1.183  |
| ILMN_1258028 | Gal3st1            | 53897  | 4.73   |
| ILMN_1258283 | Ltb                | 16994  | 3.843  |
| ILMN_1258578 | Ahnak              | 66395  | 4.134  |
| ILMN_1258629 | Col3a1             | 12825  | 2.807  |
| ILMN_1258916 | Atp13a3            | 224088 | -2.959 |
| ILMN_1259035 | Wbscr14            |        | -2.79  |
| ILMN_1259388 | Col6a1             | 12833  | 1.772  |
| ILMN_1259400 | ENSMUSG00000043795 | 677289 | 2.59   |
| ILMN_1259470 | Tmem176b           | 65963  | 3.52   |
| ILMN_1259754 | Rnf4               | 19822  | -2.534 |
| ILMN_1259919 | 6332401O19Rik      | 319832 | 3.936  |
| ILMN_1260378 | Csrp1              | 13007  | 2.428  |
| ILMN_2416628 | Cyth4              | 72318  | 2.277  |
| ILMN_2418465 | Gnai2              | 14678  | 4.284  |
| ILMN_2418811 | 2200002D01Rik      |        | 2.704  |
| ILMN_2419998 | Soat1              | 20652  | 0.957  |
| ILMN_2423730 | A930008A22Rik      |        | 5.396  |
| ILMN_2424268 | Wtip               | 101543 | 3.871  |
| ILMN_2426853 | Ubd                | 24108  | 4.772  |
| ILMN_2427307 | Iqgap2             | 544963 | -4.192 |
| ILMN_2433990 | LOC100048346       |        | 1.545  |
| ILMN_2445658 | Igsf10             | 242050 | 0.327  |
| ILMN_2467596 | Dusp16             | 70686  | 3.108  |
| ILMN_2476733 | 1200016E24Rik      |        | 2.701  |
| ILMN_2479370 | Tm4sf4             | 229302 | 2.955  |
| ILMN_2483771 | C920027118Rik      |        | 3.644  |
| ILMN_2483948 | Specc1             | 432572 | 4.906  |
| ILMN_2484274 | 0610010E21Rik      | 68332  | 1.714  |
| ILMN_2484932 | C030002B11Rik      |        | 1.65   |
| ILMN_2485340 | 9530018I07Rik      |        | 2.923  |

|              |                 |        |        |
|--------------|-----------------|--------|--------|
| ILMN_2490548 | Tspan4          | 64540  | 1.74   |
| ILMN_2492170 | Tnfsf12-tnfsf13 | 619441 | 3.876  |
| ILMN_2494251 | Tuba1a          | 22142  | 5.833  |
| ILMN_2495446 | 0610037M15Rik   |        | 0.027  |
| ILMN_2501489 | Was             | 22376  | 1.371  |
| ILMN_2503188 | Ppl             | 19041  | 5.03   |
| ILMN_2503553 | Col8a1          | 12837  | 5.779  |
| ILMN_2505185 | LOC672274       | 672274 | 5.082  |
| ILMN_2505841 | Igsf4a          |        | 2.934  |
| ILMN_2511953 | Tnfaip8         | 106869 | 1.959  |
| ILMN_2514377 | Cxadr           |        | 2.889  |
| ILMN_2514522 | 4930533K18Rik   |        | 5.307  |
| ILMN_2515363 | Tpm4            | 326618 | 5.287  |
| ILMN_2526249 | LOC381269       |        | -4.864 |
| ILMN_2526851 | LOC227393       |        | -4.472 |
| ILMN_2528515 | LOC381448       |        | 3.667  |
| ILMN_2533766 | Ccdc109a        | 215999 | -3.114 |
| ILMN_2533952 | LOC237512       |        | 3.647  |
| ILMN_2534207 | LOC380706       |        | -0.149 |
| ILMN_2534783 | LOC245069       |        | -3.232 |
| ILMN_2538597 | LOC386405       |        | 2.816  |
| ILMN_2543688 | 0610007N19Rik   |        | 4.27   |
| ILMN_2548379 | 2210015K02Rik   |        | 5.608  |
| ILMN_2588055 | Actb            | 11461  | -1.939 |
| ILMN_2588759 | Aph1a           | 226548 | -3.53  |
| ILMN_2588995 | Rab8b           | 235442 | 3.886  |
| ILMN_2589024 | Plg             | 18815  | -4.073 |
| ILMN_2590950 | Agtrap          | 11610  | -1.853 |
| ILMN_2592239 | Pigp            | 56176  | 3.403  |
| ILMN_2592881 | Jam2            | 67374  | -0.264 |
| ILMN_2595612 | Idh2            | 269951 | 4.567  |
| ILMN_2596611 | Clic1           |        | 3.38   |
| ILMN_2596961 | D430028G21Rik   | 228607 | -5.069 |
| ILMN_2598103 | Emp2            | 13731  | 5.552  |
| ILMN_2601072 | Dab1            | 13131  | 4.986  |
| ILMN_2601515 | Bpnt1           |        | -4.29  |
| ILMN_2602858 | Prickle3        | 54630  | 5.151  |
| ILMN_2603568 | Obrgrp          |        | 2.711  |
| ILMN_2606162 | Pdlim4          | 30794  | 2.985  |
| ILMN_2609323 | Lst1            |        | 1.252  |
| ILMN_2609998 | Fxyd6           | 59095  | 3.745  |
| ILMN_2611180 | Ccdc3           |        | 2.613  |
| ILMN_2611755 | Serpinb6b       | 20708  | 5.787  |

|              |           |        |        |
|--------------|-----------|--------|--------|
| ILMN_2612738 | Coq5      | 52064  | -4.226 |
| ILMN_2614313 | Lin7a     | 108030 | -4.4   |
| ILMN_2614380 | Map3k1    | 26401  | 4.622  |
| ILMN_2615468 | Fgfr1op2  | 67529  | 0.806  |
| ILMN_2618176 | Socs3     | 12702  | 4.018  |
| ILMN_2618634 | Spna2     |        | 4.732  |
| ILMN_2619107 | Lgals1    |        | 5.055  |
| ILMN_2619620 | C1qb      | 12260  | 1.231  |
| ILMN_2620053 | Als2      | 74018  | -3.718 |
| ILMN_2622671 | Acsl1     | 14081  | -4.529 |
| ILMN_2623280 | Osmr      | 18414  | 4.271  |
| ILMN_2625351 | Sh3bgrl3  | 73723  | 4.23   |
| ILMN_2625940 | Neurl     |        | 5.743  |
| ILMN_2626294 | Pam       | 18484  | 1.982  |
| ILMN_2627041 | Cx3cl1    | 20312  | 5.414  |
| ILMN_2627557 | Tbc1d19   | 67249  | 5.152  |
| ILMN_2628594 | Mttp      | 17777  | -4.842 |
| ILMN_2629112 | Asah3l    | 230379 | -2.443 |
| ILMN_2630047 | Car3      | 12350  | -3.851 |
| ILMN_2630946 | Aprt      |        | 4.614  |
| ILMN_2631161 | Fcgr4     | 246256 | -0.535 |
| ILMN_2633096 | Gstm6     | 14867  | -0.124 |
| ILMN_2634603 | LOC56628  | 56628  | 0.251  |
| ILMN_2635272 | Igh-VJ558 | 16061  | 1.914  |
| ILMN_2635813 | Nudt12    | 67993  | -3.56  |
| ILMN_2635895 | Plscr2    | 18828  | 4.546  |
| ILMN_2636424 | Itgbl1    | 223272 | 2.594  |
| ILMN_2637792 | Cryz      | 12972  | -3.014 |
| ILMN_2639036 | Hspd1     | 15510  | -3.487 |
| ILMN_2642913 | Emp1      | 13730  | 3.584  |
| ILMN_2642922 | Mtmr11    | 194126 | 3.485  |
| ILMN_2643092 | Rps9      | 76846  | 5.048  |
| ILMN_2644350 | Thy1      | 21838  | 4.731  |
| ILMN_2645662 | Tmem86a   | 67893  | 2.058  |
| ILMN_2645973 | Tff3      | 21786  | 3.843  |
| ILMN_2648409 | Cmtm7     | 102545 | 3.061  |
| ILMN_2648445 | Slc27a2   | 26458  | -3.824 |
| ILMN_2650115 | Adamtsl2  | 77794  | -0.423 |
| ILMN_2651076 | Scotin    | 66940  | 2.828  |
| ILMN_2651715 | Axl       | 26362  | 1.467  |
| ILMN_2653132 | Clec7a    | 56644  | 3.682  |
| ILMN_2653166 | Gpx8      | 69590  | 1.897  |
| ILMN_2654186 | Nedd9     | 18003  | 5.244  |

|              |               |        |        |
|--------------|---------------|--------|--------|
| ILMN_2654495 | Iqgap1        |        | 3.663  |
| ILMN_2654554 | Fgl2          | 14190  | 1.417  |
| ILMN_2654754 | Gp38          |        | 2.409  |
| ILMN_2656422 | BC028528      | 229600 | 1.971  |
| ILMN_2657478 | Cd53          | 12508  | 1.878  |
| ILMN_2657685 | Aass          | 30956  | -5.074 |
| ILMN_2658130 | Hkdc1         | 216019 | 1.131  |
| ILMN_2658501 | Ifitm3        | 66141  | 0.81   |
| ILMN_2658804 | Rras          | 20130  | 4.807  |
| ILMN_2658815 | Tmem98        | 103743 | 2.964  |
| ILMN_2659426 | Cxcl14        |        | 2.742  |
| ILMN_2659824 | Ppp1r14a      | 68458  | 0.88   |
| ILMN_2659997 | Acaa1b        | 235674 | -3.436 |
| ILMN_2660263 | Bcl2a1b       | 12045  | 3.341  |
| ILMN_2660551 | Lat           | 16797  | 3.22   |
| ILMN_2660555 | Bcl2a1d       |        | 3.38   |
| ILMN_2660862 | Sepn1         | 74777  | 3.783  |
| ILMN_2661576 | Bicc1         | 83675  | 5.269  |
| ILMN_2663130 | P2ry6         | 233571 | 2.603  |
| ILMN_2663249 | Slamf9        | 98365  | 4.587  |
| ILMN_2663585 | Jdp2          | 81703  | 3.632  |
| ILMN_2665008 | Rab31         | 106572 | 2.426  |
| ILMN_2665307 | Pilra         | 231805 | -0.481 |
| ILMN_2665629 | Ldhd          | 52815  | -5.361 |
| ILMN_2666018 | Mgp           | 17313  | 2.548  |
| ILMN_2667091 | Ppp1r3c       | 53412  | -5.686 |
| ILMN_2669289 | Htra4         | 330723 | -2.121 |
| ILMN_2670038 | Cdh16         | 12556  | 0.65   |
| ILMN_2671195 | St8sia4       | 20452  | 4.442  |
| ILMN_2671923 | Ly86          | 17084  | 2.452  |
| ILMN_2673369 | Irf8          | 15900  | 1.711  |
| ILMN_2673668 | LOC624662     | 624662 | 5.292  |
| ILMN_2673917 | 2810022L02Rik | 67198  | 2.364  |
| ILMN_2674122 | Pkia          | 18767  | 5.586  |
| ILMN_2674281 | LOC100045343  | 1E+08  | 4.673  |
| ILMN_2674483 | Gpx2          | 14776  | 5.606  |
| ILMN_2675669 | Cd72          | 12517  | 1.868  |
| ILMN_2678019 | Psmc8         | 57296  | 2.267  |
| ILMN_2680142 | Anxa5         | 11747  | 4.018  |
| ILMN_2681232 | D12Erttd647e  | 52668  | 1.439  |
| ILMN_2684370 | Igk-C         |        | 1.307  |
| ILMN_2684600 | Nalp6         |        | -3.094 |
| ILMN_2685234 | Hsd17b11      | 114664 | -3.196 |

|              |               |        |        |
|--------------|---------------|--------|--------|
| ILMN_2685565 | Tymp          | 72962  | -5.213 |
| ILMN_2686327 | Gas6          | 14456  | 4.1    |
| ILMN_2686393 | Gna12         | 14673  | -3.618 |
| ILMN_2686700 | Abca8a        | 217258 | -5.309 |
| ILMN_2686975 | Fam129b       | 227737 | 4.758  |
| ILMN_2687403 | Fcgr3         | 14131  | 1.212  |
| ILMN_2687586 | Cxcl16        | 66102  | 3.959  |
| ILMN_2689785 | Cd68          | 12514  | 0.794  |
| ILMN_2690603 | Spp1          | 20750  | 3.973  |
| ILMN_2692615 | Tgm2          | 21817  | 5.088  |
| ILMN_2692986 | 2810410P22Rik |        | -2.496 |
| ILMN_2693403 | Ela1          | 109901 | -2.01  |
| ILMN_2695008 | Ncoa4         |        | -4.425 |
| ILMN_2695819 | Ddit4l        | 73284  | 1.494  |
| ILMN_2696199 | Prosc         |        | -3.473 |
| ILMN_2696232 | Nme5          | 75533  | 3.642  |
| ILMN_2696491 | Phf11         | 219131 | 0.839  |
| ILMN_2699222 | LOC669053     | 669053 | 0.849  |
| ILMN_2699531 | Rgs10         | 67865  | 4.475  |
| ILMN_2699880 | Abca9         | 217262 | -4.932 |
| ILMN_2700715 | Cstb          | 13014  | 4.861  |
| ILMN_2702703 | Shmt2         | 108037 | -4.522 |
| ILMN_2704562 | LOC100047628  |        | 1.168  |
| ILMN_2704822 | Acaa2         |        | -4.022 |
| ILMN_2705460 | Ntrk2         | 18212  | 1.781  |
| ILMN_2705777 | Gstm5         | 14866  | 4.535  |
| ILMN_2705848 | Decr2         |        | -4.707 |
| ILMN_2706268 | Scara3        | 219151 | 1.128  |
| ILMN_2708477 | Spink3        |        | 4.289  |
| ILMN_2708928 | Bdh1          | 71911  | -2.546 |
| ILMN_2710185 | Mylc2b        | 67938  | 3.784  |
| ILMN_2710819 | Csf1r         | 12978  | 1.338  |
| ILMN_2710905 | S100a8        | 20201  | 1.774  |
| ILMN_2711163 | Ctsk          | 13038  | 3.346  |
| ILMN_2711267 | Krt18         | 16668  | 5.885  |
| ILMN_2712075 | Lcn2          | 16819  | 3.609  |
| ILMN_2712120 | S100a6        | 20200  | 5.528  |
| ILMN_2712578 | Rbm47         | 245945 | -3.238 |
| ILMN_2713055 | PscA          | 72373  | 5.428  |
| ILMN_2713969 | B9d1          | 27078  | 5.686  |
| ILMN_2714787 | 1110038B12Rik | 68763  | 3.505  |
| ILMN_2714796 | Coro1a        | 12721  | 3.056  |
| ILMN_2715270 | Slc5a1        | 20537  | 5.118  |

|              |           |        |        |
|--------------|-----------|--------|--------|
| ILMN_2715840 | C1qc      | 12262  | 0.473  |
| ILMN_2716389 | Smpd3     | 58994  | 3.028  |
| ILMN_2717439 | Pip4k2a   | 18718  | 1.344  |
| ILMN_2718217 | Tubb6     | 67951  | 5.577  |
| ILMN_2720047 | AW124722  |        | -4.208 |
| ILMN_2722732 | Srgn      | 19073  | 2.11   |
| ILMN_2722784 | Cd3g      | 12502  | 2.36   |
| ILMN_2722893 | LOC637227 | 637227 | 0.909  |
| ILMN_2722996 | Sirpa     | 19261  | 3.958  |
| ILMN_2723369 | Npal2     | 223473 | 2.214  |
| ILMN_2724294 | Gpx7      | 67305  | 5.625  |
| ILMN_2725414 | Cd9       |        | 3.26   |
| ILMN_2725927 | Serpina3g | 20715  | -0.58  |
| ILMN_2726055 | Shmt1     |        | -5.394 |
| ILMN_2727116 | Sox4      | 20677  | 5.063  |
| ILMN_2727251 | Slc4a9    | 240215 | 1.209  |
| ILMN_2728379 | Ivd       | 56357  | -4.587 |
| ILMN_2728796 | C1rl      | 232371 | -5.932 |
| ILMN_2729458 | Idh1      | 15926  | -4.473 |
| ILMN_2730100 | Cib3      | 234421 | 2.457  |
| ILMN_2730797 | Slc25a10  | 27376  | -3.904 |
| ILMN_2731020 | Sult5a1   | 57429  | -3.922 |
| ILMN_2731454 | Evl       | 14026  | 1.416  |
| ILMN_2731550 | Brp17     |        | -5.14  |
| ILMN_2731760 | Myo1f     | 17916  | 2.456  |
| ILMN_2731949 | Klf6      | 23849  | 4.744  |
| ILMN_2732848 | Tagln2    | 21346  | 4.647  |
| ILMN_2733356 | Endod1    | 71946  | 4.452  |
| ILMN_2734340 | Stx11     | 74732  | 2.375  |
| ILMN_2734683 | Fstl1     | 14314  | 2.645  |
| ILMN_2734729 | H2-Aa     | 14960  | 3.797  |
| ILMN_2736539 | Cyp2c55   | 72082  | -3.055 |
| ILMN_2739760 | Prelp     | 116847 | 3.152  |
| ILMN_2740465 | Il1rap    | 16180  | -5.55  |
| ILMN_2740852 | F2r       | 14062  | 4.309  |
| ILMN_2740965 | Prss8     | 76560  | 5.543  |
| ILMN_2741096 | Timp3     | 21859  | 3.896  |
| ILMN_2741169 | Cd8b1     | 12526  | 2.9    |
| ILMN_2742075 | Cd14      | 12475  | 3.762  |
| ILMN_2743013 | Ncf4      | 17972  | 1.612  |
| ILMN_2743244 | Cd86      | 12524  | 0.012  |
| ILMN_2744380 | Npc2      | 67963  | 3.192  |
| ILMN_2744514 | Veph1     | 72789  | 5.057  |

|              |               |        |        |
|--------------|---------------|--------|--------|
| ILMN_2746086 | Tax1bp3       | 76281  | 5.21   |
| ILMN_2746556 | Dkk3          | 50781  | 0.859  |
| ILMN_2746811 | Gpr108        | 78308  | -3.835 |
| ILMN_2746895 | Gpr120        | 107221 | 5.147  |
| ILMN_2749747 | 2410004L22Rik | 76478  | 5.311  |
| ILMN_2749840 | Slc47a1       | 67473  | -5.209 |
| ILMN_2749842 | 1300013J15Rik | 67473  | -5.232 |
| ILMN_2749958 | LOC676420     | 676420 | 3.479  |
| ILMN_2750047 | Csf2rb2       | 12984  | 0.752  |
| ILMN_2750548 | Gnpda1        |        | -4.923 |
| ILMN_2754690 | Acad8         | 66948  | -4.526 |
| ILMN_2755660 | LOC100044779  | 1E+08  | 4.706  |
| ILMN_2756041 | Pkm2          | 18746  | 2.339  |
| ILMN_2757232 | Aqp4          | 11829  | -2.809 |
| ILMN_2757807 | BC031353      | 235493 | -4.18  |
| ILMN_2757966 | Cxcl4         | 56744  | 1.979  |
| ILMN_2758029 | Prtn3         | 19152  | 1.477  |
| ILMN_2758878 | Tmem66        | 67887  | -3.469 |
| ILMN_2759309 | Rnase6        | 78416  | 2.312  |
| ILMN_2759344 | LOC100048733  | 1E+08  | 2.915  |
| ILMN_2760105 | Olig1         | 50914  | 0.18   |
| ILMN_2760979 | Tgfbr2        | 21813  | 4.694  |
| ILMN_2762944 | Ifi27         | 76933  | 1.076  |
| ILMN_2764466 | Capsl         | 75568  | 2.635  |
| ILMN_2764588 | Igfbp7        | 29817  | 3.092  |
| ILMN_2769567 | F2r1          |        | 5.525  |
| ILMN_2769777 | Msc           | 17681  | 1.081  |
| ILMN_2770066 | LOC100044439  |        | 3.09   |
| ILMN_2771034 | Mfge8         |        | 5.463  |
| ILMN_2771182 | H2-Q8         |        | -0.248 |
| ILMN_2771641 | Aldh8a1       | 237320 | -4.988 |
| ILMN_2772077 | Bok           |        | 3.879  |
| ILMN_2773113 | Capg          | 12332  | 3.527  |
| ILMN_2773259 | Lum           |        | -0.049 |
| ILMN_2774507 | E430002G05Rik |        | 0.907  |
| ILMN_2774572 | Crygn         |        | 0.194  |
| ILMN_2775660 | Myl6          |        | 3.843  |
| ILMN_2776087 | Rab25         | 53868  | 0.006  |
| ILMN_2776278 | Ly6e          |        | 1.955  |
| ILMN_2776419 | Dncl1         |        | 5.564  |
| ILMN_2776431 | C1qa          | 12259  | 1.102  |
| ILMN_2777359 | Serpinh1      |        | 2.384  |
| ILMN_2777462 | Pnpla3        | 116939 | 5.16   |

|              |               |        |        |
|--------------|---------------|--------|--------|
| ILMN_2777769 | H2-DMa        | 14998  | 3.043  |
| ILMN_2778151 | Sox9          |        | 4.628  |
| ILMN_2778655 | Vcam1         | 22329  | 1.788  |
| ILMN_2781030 | Napsa         | 16541  | 2.706  |
| ILMN_2789294 | Tmem25        | 71687  | -3.905 |
| ILMN_2789948 | Arhgdib       | 11857  | 1.611  |
| ILMN_2790373 | Snn           | 20621  | 5.327  |
| ILMN_2791028 | App           | 11820  | 4.958  |
| ILMN_2791665 | Agxt2         | 268782 | -3.889 |
| ILMN_2793522 | Tnfrsf19      | 29820  | 3.735  |
| ILMN_2794645 | Cyr61         | 16007  | 4.788  |
| ILMN_2795106 | Cyp1a2        | 13077  | -3.581 |
| ILMN_2795412 | Tmem176a      | 66058  | 2.97   |
| ILMN_2800813 | Cabc1         | 67426  | -3.573 |
| ILMN_2801891 | Cygb          | 114886 | 1.144  |
| ILMN_2803674 | S100a9        | 20202  | 1.821  |
| ILMN_2804444 | Pcdh17        | 219228 | 3.371  |
| ILMN_2804487 | Aif1          | 11629  | 1.498  |
| ILMN_2806159 | Tmsb4x        | 19241  | 3.291  |
| ILMN_2806439 | Slc17a8       | 216227 | -2.374 |
| ILMN_2806700 | Cyba          | 13057  | 1.833  |
| ILMN_2808811 | Gpd1          | 14555  | -2.138 |
| ILMN_2810882 | Ppic          | 19038  | 3.418  |
| ILMN_2812926 | Slc30a10      | 226781 | -5.328 |
| ILMN_2814005 | Nid1          | 18073  | 4.919  |
| ILMN_2814974 | Klra2         | 16633  | 0.547  |
| ILMN_2815626 | Palm          | 18483  | 5.053  |
| ILMN_2816180 | Lbh           | 77889  | 0.835  |
| ILMN_2819558 | Bach2         | 12014  | -3.618 |
| ILMN_2820893 | Selplg        | 20345  | 2.411  |
| ILMN_2821460 | Ptpn18        | 19253  | 2.292  |
| ILMN_2821850 | Nampt         | 59027  | 3.585  |
| ILMN_2827081 | Sgk2          | 27219  | -2.032 |
| ILMN_2830666 | 9130409I23Rik | 619326 | -3.956 |
| ILMN_2831283 | Tmem43        | 74122  | 4.321  |
| ILMN_2831669 | EG240549      | 240549 | -4.099 |
| ILMN_2833163 | BC064033      | 208164 | 0.599  |
| ILMN_2834379 | Tgfb1         | 21810  | 0.159  |
| ILMN_2837189 | 6720467C03Rik | 68099  | 3.72   |
| ILMN_2837671 | Fblim1        | 74202  | 2.012  |
| ILMN_2838317 | Pqlc3         | 217430 | 4.973  |
| ILMN_2844829 | Prodh2        | 56189  | -3.063 |
| ILMN_2845214 | Lrpprc        | 72416  | -4.778 |



|              |                    |        |        |
|--------------|--------------------|--------|--------|
| ILMN_2850233 | Elf3               | 13710  | 4.033  |
| ILMN_2851671 | Myadm              | 50918  | 3.974  |
| ILMN_2857957 | Mgll               | 23945  | -4.02  |
| ILMN_2860479 | Arpc1b             | 11867  | 3.402  |
| ILMN_2864309 | OTTMUSG00000000971 |        | -1.589 |
| ILMN_2864416 | Rtp3               | 235636 | -3.782 |
| ILMN_2866901 | Efemp2             | 58859  | 1.938  |
| ILMN_2867147 | Tyrobp             | 22177  | 1.795  |
| ILMN_2870672 | Fbln1              | 14114  | 1.031  |
| ILMN_2871628 | Mapk8ip1           | 19099  | 4.472  |
| ILMN_2873750 | Gldc               | 104174 | -2.895 |
| ILMN_2874853 | Eef1b2             | 55949  | 3.147  |
| ILMN_2878071 | Lyz                | 17110  | 3.01   |
| ILMN_2879588 | Lhfp               | 108927 | 2.156  |
| ILMN_2885532 | Cpt2               | 12896  | -5.177 |
| ILMN_2886896 | 4632417N05Rik      | 74032  | -5.072 |
| ILMN_2888191 | Ccr5               | 12774  | 0.227  |
| ILMN_2888940 | 1810033M07Rik      | 69187  | -4.617 |
| ILMN_2890357 | 2610027C15Rik      | 230752 | -0.142 |
| ILMN_2894678 | H2-T10             | 15024  | -2.883 |
| ILMN_2896601 | Icam1              | 15894  | 5.224  |
| ILMN_2896768 | Cbr3               | 109857 | 4.213  |
| ILMN_2901626 | Tnfrsf21           | 94185  | -1.831 |
| ILMN_2909150 | Ctgf               | 14219  | 3.858  |
| ILMN_2910295 | Crim1              | 50766  | 3.805  |
| ILMN_2910934 | Cd52               | 23833  | 2.594  |
| ILMN_2911344 | Plscr1             | 22038  | 4.902  |
| ILMN_2913590 | Lonp2              | 66887  | -4.918 |
| ILMN_2914744 | Hn1                | 15374  | 5.01   |
| ILMN_2915232 | Cotl1              | 72042  | 1.859  |
| ILMN_2923607 | Phlda3             | 27280  | 5.507  |
| ILMN_2924505 | Gys2               | 232493 | -4.931 |
| ILMN_2925281 | Abcd3              | 19299  | -3.699 |
| ILMN_2925947 | Abat               | 268860 | -5.213 |
| ILMN_2932164 | Notum              | 77583  | -2.279 |
| ILMN_2933887 | 1200013B08Rik      | 74131  | 1.744  |
| ILMN_2939503 | Ttc39a             | 230603 | 1.974  |
| ILMN_2939681 | Lyzs               | 17105  | 3.039  |
| ILMN_2941728 | Nenf               | 66208  | 5.38   |
| ILMN_2941790 | Cldn6              | 54419  | 1.387  |
| ILMN_2943599 | Ngfrap1            | 12070  | 4.785  |
| ILMN_2950286 | Ankrd1             | 107765 | 5.707  |
| ILMN_2951682 | Cobl               | 12808  | 2.669  |

|              |                    |        |        |
|--------------|--------------------|--------|--------|
| ILMN_2954575 | Arhgap30           | 226652 | 1.771  |
| ILMN_2954868 | Oasl2              | 23962  | 1.973  |
| ILMN_2959372 | Clec4b1            | 69810  | 2.342  |
| ILMN_2960044 | Cyp4a31            | 545670 | -3.413 |
| ILMN_2964042 | Bgn                | 12111  | 0.611  |
| ILMN_2964185 | H2-M2              | 14990  | 4.798  |
| ILMN_2965613 | Abca6              | 76184  | -5.384 |
| ILMN_2967266 | Fxyd5              | 18301  | 3.634  |
| ILMN_2971688 | Nrg1               | 211323 | 4.334  |
| ILMN_2971816 | Gltp               | 56356  | 2.583  |
| ILMN_2973156 | Esrrg              | 26381  | -2.829 |
| ILMN_2973824 | Car14              | 23831  | -3.596 |
| ILMN_2976159 | Mreg               | 381269 | -5.561 |
| ILMN_2976211 | Cyp2b23            | 243881 | -3.787 |
| ILMN_2981169 | Ifit2              | 15958  | 4.485  |
| ILMN_2983516 | Slc11a1            | 18173  | -0.727 |
| ILMN_2984744 | Emp3               | 13732  | 1.926  |
| ILMN_2986051 | Ccbl1              | 70266  | -4.663 |
| ILMN_2987599 | AI317395           | 215929 | -5.772 |
| ILMN_2987709 | Slc15a3            | 65221  | -0.581 |
| ILMN_2988143 | Plac8              | 231507 | 0.478  |
| ILMN_2992232 | Mlxipl             | 58805  | -1.723 |
| ILMN_2993314 | Clec4n             | 56620  | 2.109  |
| ILMN_2994299 | Hgfac              | 54426  | -4.257 |
| ILMN_2999329 | Serpina5           | 268591 | 0.017  |
| ILMN_3000236 | F11                | 109821 | -4.447 |
| ILMN_3006219 | Fyb                | 23880  | 1.148  |
| ILMN_3008361 | Bmper              | 73230  | 1.24   |
| ILMN_3009910 | Rbm13              | 67920  | 2.722  |
| ILMN_3033562 | OTTMUSG00000017677 | 574404 | 2.082  |
| ILMN_3040693 | Lamc3              | 23928  | 4.131  |
| ILMN_3046836 | Suc1g2             | 20917  | -3.495 |
| ILMN_3054840 | AW061290           | 381110 | -3.904 |
| ILMN_3061070 | Slc25a20           | 57279  | -4.265 |
| ILMN_3062267 | Acot1              | 26897  | -0.989 |
| ILMN_3067068 | Tmsb10             | 19240  | 3.81   |
| ILMN_3070469 | Entpd5             | 12499  | -4.057 |
| ILMN_3079257 | Mup5               | 17844  | -5.08  |
| ILMN_3091003 | Ms4a7              | 109225 | 5.49   |
| ILMN_3100812 | Gpx4               | 625249 | 3.656  |
| ILMN_3103896 | Timp1              | 21857  | 4.894  |
| ILMN_3107059 | Espn               | 56226  | 4.766  |
| ILMN_3114124 | Hsd3b7             | 101502 | -4.573 |

|              |          |        |        |
|--------------|----------|--------|--------|
| ILMN_3117876 | Chi3l3   | 12655  | 1.781  |
| ILMN_3118707 | Sla      | 20491  | 1.915  |
| ILMN_3120510 | Gvin1    | 74558  | 2.462  |
| ILMN_3131679 | Usp18    | 24110  | 2.427  |
| ILMN_3139405 | Hbs1l    | 56422  | -4.753 |
| ILMN_3141801 | Wfdc15b  | 192201 | 1.919  |
| ILMN_3151149 | Cpne8    | 66871  | 4.172  |
| ILMN_3152506 | Atp11c   | 320940 | -3.922 |
| ILMN_3158499 | Mdk      | 17242  | 1.533  |
| ILMN_3158698 | BC046404 | 192976 | 4.558  |
| ILMN_3161652 | Clec4a3  | 73149  | 0.224  |

---

**Supplementary Table 2. Functional categories of genes in the SOH signature.**

| <b>Functional category*</b>            | <b>P value<sup>#</sup></b> |
|----------------------------------------|----------------------------|
| Cellular movement                      | $5.41 \times 10^{-21}$     |
| Cellular growth and proliferation      | $7.00 \times 10^{-19}$     |
| Cell-to-cell signaling and interaction | $4.80 \times 10^{-18}$     |
| Cellular function and maintenance      | $7.61 \times 10^{-18}$     |
| Cell death and survival                | $1.31 \times 10^{-13}$     |
| Cellular development                   | $6.02 \times 10^{-13}$     |
| Lipid metabolism                       | $3.43 \times 10^{-11}$     |
| Small molecule biochemistry            | $3.43 \times 10^{-11}$     |
| Free radical scavenging                | $2.14 \times 10^{-9}$      |
| Protein synthesis                      | $2.80 \times 10^{-7}$      |
| Cellular compromise                    | $1.18 \times 10^{-6}$      |
| Cellular assembly and organization     | $1.84 \times 10^{-6}$      |
| Cell signaling                         | $2.44 \times 10^{-6}$      |
| Post-translational modification        | $7.99 \times 10^{-6}$      |
| Amino acid metabolism                  | $1.11 \times 10^{-5}$      |
| Molecular transport                    | $1.39 \times 10^{-5}$      |
| Protein trafficking                    | $3.72 \times 10^{-5}$      |
| Vitamin and mineral metabolism         | $9.46 \times 10^{-5}$      |
| Protein folding                        | $1.68 \times 10^{-4}$      |
| Cell cycle                             | $1.71 \times 10^{-4}$      |

\*Functional category was defined by the Ingenuity Knowledge Base database.

<sup>#</sup>Fisher's exact test.

**Supplementary Table 3. Canonical Pathways enriched in the SOH signature.**

| <b>Ingenuity Canonical Pathways</b>             | <b>P values<sup>#</sup></b> |
|-------------------------------------------------|-----------------------------|
| Cdc42 Signaling                                 | 1.4 x 10 <sup>-6</sup>      |
| CD28 Signaling in T Helper Cells                | 1.0 x 10 <sup>-5</sup>      |
| OX40 Signaling Pathway                          | 1.6 x 10 <sup>-5</sup>      |
| Nur77 Signaling in T Lymphocytes                | 9.5 x 10 <sup>-5</sup>      |
| iCOS-iCOSL Signaling in T Helper Cells          | 0.0004                      |
| Glycine Biosynthesis I                          | 0.0006                      |
| Fatty Acid beta-oxidation I                     | 0.001                       |
| Glutathione Redox Reactions I                   | 0.001                       |
| STAT3 Pathway                                   | 0.002                       |
| T Cell Receptor Signaling                       | 0.003                       |
| Glutamate Degradation III (via 4-aminobutyrate) | 0.006                       |
| Sphingosine-1-phosphate Signaling               | 0.006                       |
| Signaling by Rho Family GTPases                 | 0.007                       |
| IL-10 Signaling                                 | 0.007                       |

<sup>#</sup>Fisher's exact test.

**Supplementary Table 4. Significant association between the SOH subtype and YAP1 protein expression in HCC.**

| <b>YAP1 expression</b> | <b>SOH</b> | <b>AH</b> | <b>Total</b> |
|------------------------|------------|-----------|--------------|
| High                   | 6          | 13        | 19           |
| Low                    | 0          | 13        | 13           |
| Total                  | 6          | 26        | 32           |

$P = 0.02$  by  $\chi^2$ -test

**Supplementary Table 5. Univariate and multivariate Cox regression analyses of recurrence-free survival with continuous SOH probability.**

| Characteristic             | Univariate            |         | Multivariate          |         |
|----------------------------|-----------------------|---------|-----------------------|---------|
|                            | Hazard ratio (95% CI) | P value | Hazard ratio (95% CI) | P value |
| Patient sex (M or F)       | 1.4 (0.89–2.18)       | 0.14    | 1.2 (0.75–1.9)        | 0.44    |
| Age (>60 years or not)     | 0.88 (0.62–1.25)      | 0.49    | 0.93 (0.63–1.37)      | 0.72    |
| AFP (>300 ng/ml or not)    | 1.25 (0.94–1.67)      | 0.12    | 1.0 (0.74–1.37)       | 0.98    |
| Cirrhosis (yes or no)      | 1.08 (0.72–1.64)      | 0.68    | 1.2 (0.78–1.9)        | 0.39    |
| Tumor size (>5 cm or not)  | 1.34 (1.0–1.79)       | 0.04    | 1.14 (0.83–1.58)      | 0.4     |
| Cohort (Korean or FULCI)   | 1.17 (0.85–1.59)      | 0.32    | 1.13 (0.8–1.6)        | 0.46    |
| BCLC stage (B/C/D or 0/A)  | 1.74 (1.2–2.3)        | < 0.001 | 1.42 (1.0–2.0)        | 0.04    |
| SOH signature (continuous) | 3.8 (2.1–7.0)         | < 0.001 | 2.9 (1.5–5.7)         | 0.001   |

**Supplementary Table 6. Univariate and multivariate Cox regression analyses of overall survival.**

| Characteristic            | Univariate            |         | Multivariate          |         |
|---------------------------|-----------------------|---------|-----------------------|---------|
|                           | Hazard ratio (95% CI) | P value | Hazard ratio (95% CI) | P value |
| Patient sex (M or F)      | 1.3 (0.79–2.2)        | 0.27    | 1.0 (0.59–1.7)        | 0.92    |
| Age (>60 years or not)    | 0.89 (0.15–1.36)      | 0.6     | 0.98 (0.62–1.5)       | 0.94    |
| AFP (>300 ng/ml or not)   | 1.7 (1.2–2.3)         | 0.001   | 1.2 (0.78–1.8)        | 0.2     |
| Cirrhosis (yes or no)     | 1.3 (0.8–2.2)         | 0.25    | 1.38 (0.8–2.3)        | 0.23    |
| Tumor size (>5 cm or not) | 2.0 (1.4–2.7)         | < 0.001 | 1.6 (1.1–2.0)         | 0.01    |
| Cohort (Korean or FULCI)  | 0.97 (0.67–14)        | 0.9     | 0.87 (0.58–1.3)       | 0.53    |
| BCLC stage (B/C/D or 0/A) | 2.6 (1.8–3.6)         | < 0.001 | 2.1 (1.5–3.2)         | < 0.001 |
| SOH signature (SOH or AH) | 2.2 (1.5–3.2)         | < 0.001 | 1.8 (1.2–2.6)         | 0.003   |

**Supplementary Table 7. Univariate and multivariate Cox regression analyses of overall survival with continuous SOH probability.**

| Characteristic             | Univariate            |         | Multivariate          |         |
|----------------------------|-----------------------|---------|-----------------------|---------|
|                            | Hazard ratio (95% CI) | P value | Hazard ratio (95% CI) | P value |
| Patient sex (M or F)       | 1.3 (0.79–2.2)        | 0.27    | 1.0 (0.6–1.7)         | 0.92    |
| Age (>60 years or not)     | 0.89 (0.15–1.36)      | 0.6     | 1.1 (0.71–1.7)        | 0.94    |
| AFP (>300 ng/ml or not)    | 1.6 (1.2–2.3)         | 0.001   | 1.2 (0.86–1.8)        | 0.2     |
| Cirrhosis (yes or no)      | 1.3 (0.8–2.2)         | 0.25    | 1.45 (0.84–2.5)       | 0.23    |
| Tumor size (>5 cm or not)  | 2.0 (1.4–2.7)         | < 0.001 | 1.6 (1.1–2.3)         | 0.01    |
| Cohort (Korean or FULCI)   | 0.97 (0.67–14)        | 0.9     | 0.86 (0.57–1.3)       | 0.53    |
| BCLC stage (B/C/D or 0/A)  | 2.6 (1.8–3.6)         | < 0.001 | 2.1 (1.4–3.1)         | < 0.001 |
| SOH signature (continuous) | 6.6 (3.2–13.6)        | < 0.001 | 4.3 (2.0–9.2)         | < 0.001 |

CI, confidence interval

AFP, alpha-fetoprotein

BCLC, Barcelona Clinic Liver Cancer

SOH, silence of Hippo pathway

AH, active Hippo pathway

FULCI, Fudan University Liver Cancer Institute

**SupplementaryTable 8.** Drop in concordance index in multivariable analysis

|                           | Drop in concordance index<br>(95% CI) | p-value |
|---------------------------|---------------------------------------|---------|
| Patient sex (M or F)      | 0.003 (-0.006 to 0.016)               | 0.29    |
| Age (>60 years or not)    | 0.004 (-0.005 to 0.023)               | 0.29    |
| AFP (>300 ng/ml or not)   | 0.002 (-0.007 to 0.016)               | 0.37    |
| Cirrhosis (yes or no)     | 0.003 (-0.016 to 0.016)               | 0.27    |
| Tumor size (>5 cm or not) | 0.002 (-0.007 to 0.016)               | 0.37    |
| Cohort (Korean or FULCI)  | 0.007 (-0.007 to 0.03)                | 0.24    |
| BCLC stage (B/C/D or 0/A) | 0.016 (-0.008 to 0.48)                | 0.12    |
| SOH signature (SOH or AH) | 0.02 (-0.001 to 0.056)                | 0.03    |



**Supplementary Table 9. Concordance of silence of Hippo signature with other prognostic HCC gene expression signatures in the NCI cohort.**

| <b>Prognostic signature</b> | <b>SOH</b> | <b>AH</b> | <b>Total</b> | <b>P value*</b>         |
|-----------------------------|------------|-----------|--------------|-------------------------|
| Number of patients          | 24         | 89        | 113          |                         |
| NCI HS signature            |            |           |              | 5.4 x 10 <sup>-19</sup> |
| HS (poor)                   | 20         | 2         | 22           |                         |
| HC (good)                   | 4          | 87        | 91           |                         |
| 65-gene risk score          |            |           |              | 3.5 x 10 <sup>-7</sup>  |
| High (poor)                 | 24         | 37        | 61           |                         |
| Low (good)                  | 0          | 52        | 52           |                         |

\* $\chi^2$ -test

SOH, silence of Hippo pathway

AH, active Hippo pathway

HS, hepatic stem cell subtype (formerly known as HB subtype)

HC, hepatocyte subtype

**Supplementary Table 10. Characteristics of HCC patients in the MSH cohort, stratified by SOH signature.**

| <b>Characteristic</b> | <b>SOH</b> | <b>AH</b> | <b>Total</b> | <b>P value*</b>        |
|-----------------------|------------|-----------|--------------|------------------------|
| No. of patients       | 22         | 69        | 91           |                        |
| pAKT staining         |            |           |              | 0.017                  |
| Positive              | 11         | 16        | 27           |                        |
| Negative              | 10         | 49        | 59           |                        |
| ND                    | 1          | 4         | 5            |                        |
| pIGFR1 staining       |            |           |              | 0.019                  |
| Positive              | 8          | 8         | 16           |                        |
| Negative              | 13         | 49        | 62           |                        |
| ND                    | 1          | 12        | 13           |                        |
| pS6 staining          |            |           |              | 1.4 x 10 <sup>-4</sup> |
| Positive              | 18         | 22        | 40           |                        |
| Negative              | 4          | 41        | 45           |                        |
| ND                    | 0          | 6         | 6            |                        |

\* $\chi^2$ -test

SOH, silence of Hippo pathway

AH, active Hippo pathway

ND, not determined
